# Supplementary material
Source: PubMed Central journal article supplement (PMC4743048)
Supplement: NIHMS734651-supplement.pdf [file NIHMS734651-supplement.pdf]

## **Blunted Neural Responses to Reward in Remitted Major Depression: A High-Density Event-Related Potential Study**

### *Supplemental Information*

#### **PRT Quality Control Criteria**

Participants were excluded if more than 10% of trials were outliers. Additionally, subjects were required to perform above chance accuracy ( $\geq 55\%$ ) to ensure that they were exposed to the intended asymmetrical (3:1) reinforcement schedule.

#### **Artifact Rejection Criteria**

Artifacts were rejected using a semi-automated procedure with a maximal allowed voltage step of 50  $\mu\text{V}$  between sample points, a maximal voltage difference of 150  $\mu\text{V}$  within a 100-ms interval, and a minimum allowed voltage of 0.5  $\mu\text{V}$  within a 100-ms interval. Subjects were only considered for inclusion in ERP analyses if their behavioral PRT data passed quality control criteria.

Of the 60 possible segments of ERP data recorded, the mean number of usable, artifact-free segments across the entire sample was 57.78 (SD = 2.43, Min = 48, Max = 60). For controls, the mean number of artifact-free segments was 57.76 (SD = 2.53, Min = 48, Max = 60) and for the rMDD group the mean was 57.81 (SD = 2.34, Min = 53, Max = 60).

**LORETA ROI Voxel Numbers**

The following voxels were included in the respective ROIs:

| <u>ROI</u>             | <u>Voxel Number</u>      |
|------------------------|--------------------------|
| Posterior OFC:         | 351, 360, 561, 568       |
| vmPFC:                 | 784, 791, 792, 799, 1184 |
| pgACC:                 | 962, 1152, 1327          |
| ACC metacluster:       | 1495, 1502, 1654, 1660   |
| PCC:                   | 1590, 1765, 1770         |
| Pre-SMA:               | 1998, 1999, 2147, 2151   |
| Right anterior insula: | 756, 764                 |
| Left anterior insula:  | 544, 753, 761            |

**Additional Behavioral Findings**

*Accuracy.* A *Group x Block x Stimulus* interaction emerged for accuracy on the PRT,  $F_{(1,57)} = 4.07$ ,  $p = .048$ ,  $\eta_p^2 = .07$ . In controls, accuracy to the rich stimulus increased across blocks ( $p = .04$ ), whereas accuracy to the lean stimulus decreased across blocks ( $p = .003$ ). In contrast, the rMDD group showed no changes in accuracy to either the rich or lean stimulus (both  $ps > .05$ ). There were no differences between groups at either block (both  $ps > .05$ ; Fig. S1A).

*Reaction Time.* There was a significant *Group x Block* interaction for reaction time (RT),  $F_{(1,57)} = 4.56$ ,  $p = .04$ ,  $\eta_p^2 = .07$ . For controls, RT decreased across blocks ( $p < .001$ ) but there was no change in the rMDD group ( $p = .39$ ). There were no differences between groups at either block (both  $ps > .05$ ; Fig. S1B).

### Associations with Depression Chronicity

In the rMDD group, a higher number of previous depressive episodes was associated with a trend-level reduction in overall response bias on the PRT ( $r = -.36, p = .07$ ). Furthermore, a greater number of months in remission was associated with a significantly higher PRT delta score ( $r = .45, p = .02$ ). There was no correlation between the number of prior depressive episodes or time in remission and the amplitude at PCA factor TF4/SF2 or reward-related activity in the ACC LORETA clusters (all  $ps > .05$ ).

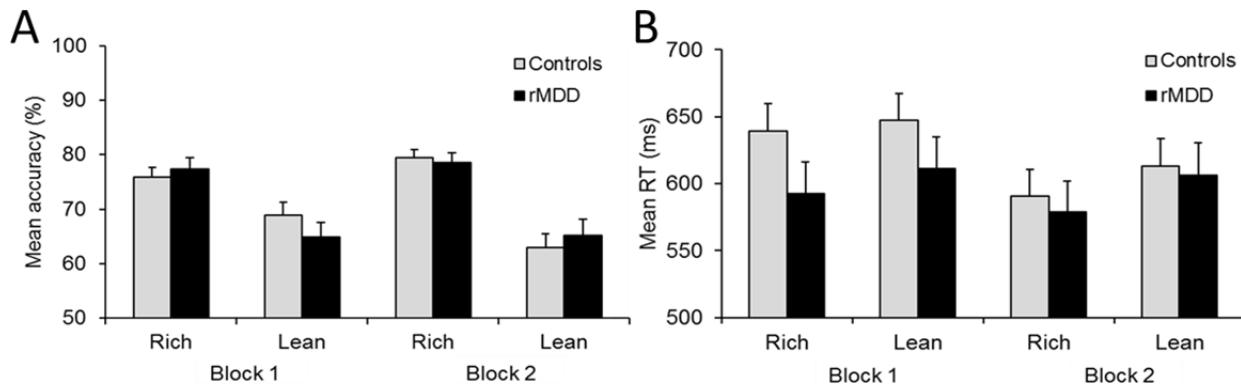

**Figure S1.** Mean accuracy (A) and RT (B) for the rich and lean stimuli across block 1 and block 2 of the PRT (+SEM) for the control and remitted depressed (rMDD) groups.
